# Supplementary material
Source: PubMed Central journal article supplement (PMC6990730)
Supplement: jamaoncol-6-e194489-s001.pdf [file jamaoncol-6-e194489-s001.pdf]

## Supplementary Online Content

Sonbol MB, Mountjoy LJ, Firwana B, et al. The role of maintenance strategies in metastatic colorectal cancer: a systematic review and network meta-analysis of randomized clinical trials. *JAMA Oncol*. Published online December 19, 2019. doi:10.1001/jamaoncol.2019.4489

**eFigure 1.** Screening and Selection Process

**eFigure 2.** Evidence Network

**eFigure 3.** Ranking Probabilities of the Different Comparisons for Overall Survival

**eFigure 4.** Ranking Probabilities of the Different Comparisons for Progression-Free Survival

**eFigure 5.** Ranking Probabilities of the Different Comparisons for Overall Survival

**eFigure 6.** Ranking Probabilities of the Different Comparisons for Progression-Free Survival

**eFigure 7.** Risk of Bias Graph

**eFigure 8.** Risk of Bias Graph

**eTable 1.** Baseline Characteristics

**eTable 2.** Ranking Probabilities of Different Maintenance Strategies

**eTable 3.** Quality of Evidence Table (GRADE)

**eTable 4.** Adverse Events

**eMethods.** Search Strategy

This supplementary material has been provided by the authors to give readers additional information about their work.

**eFigure 1.** Screening and Selection Process

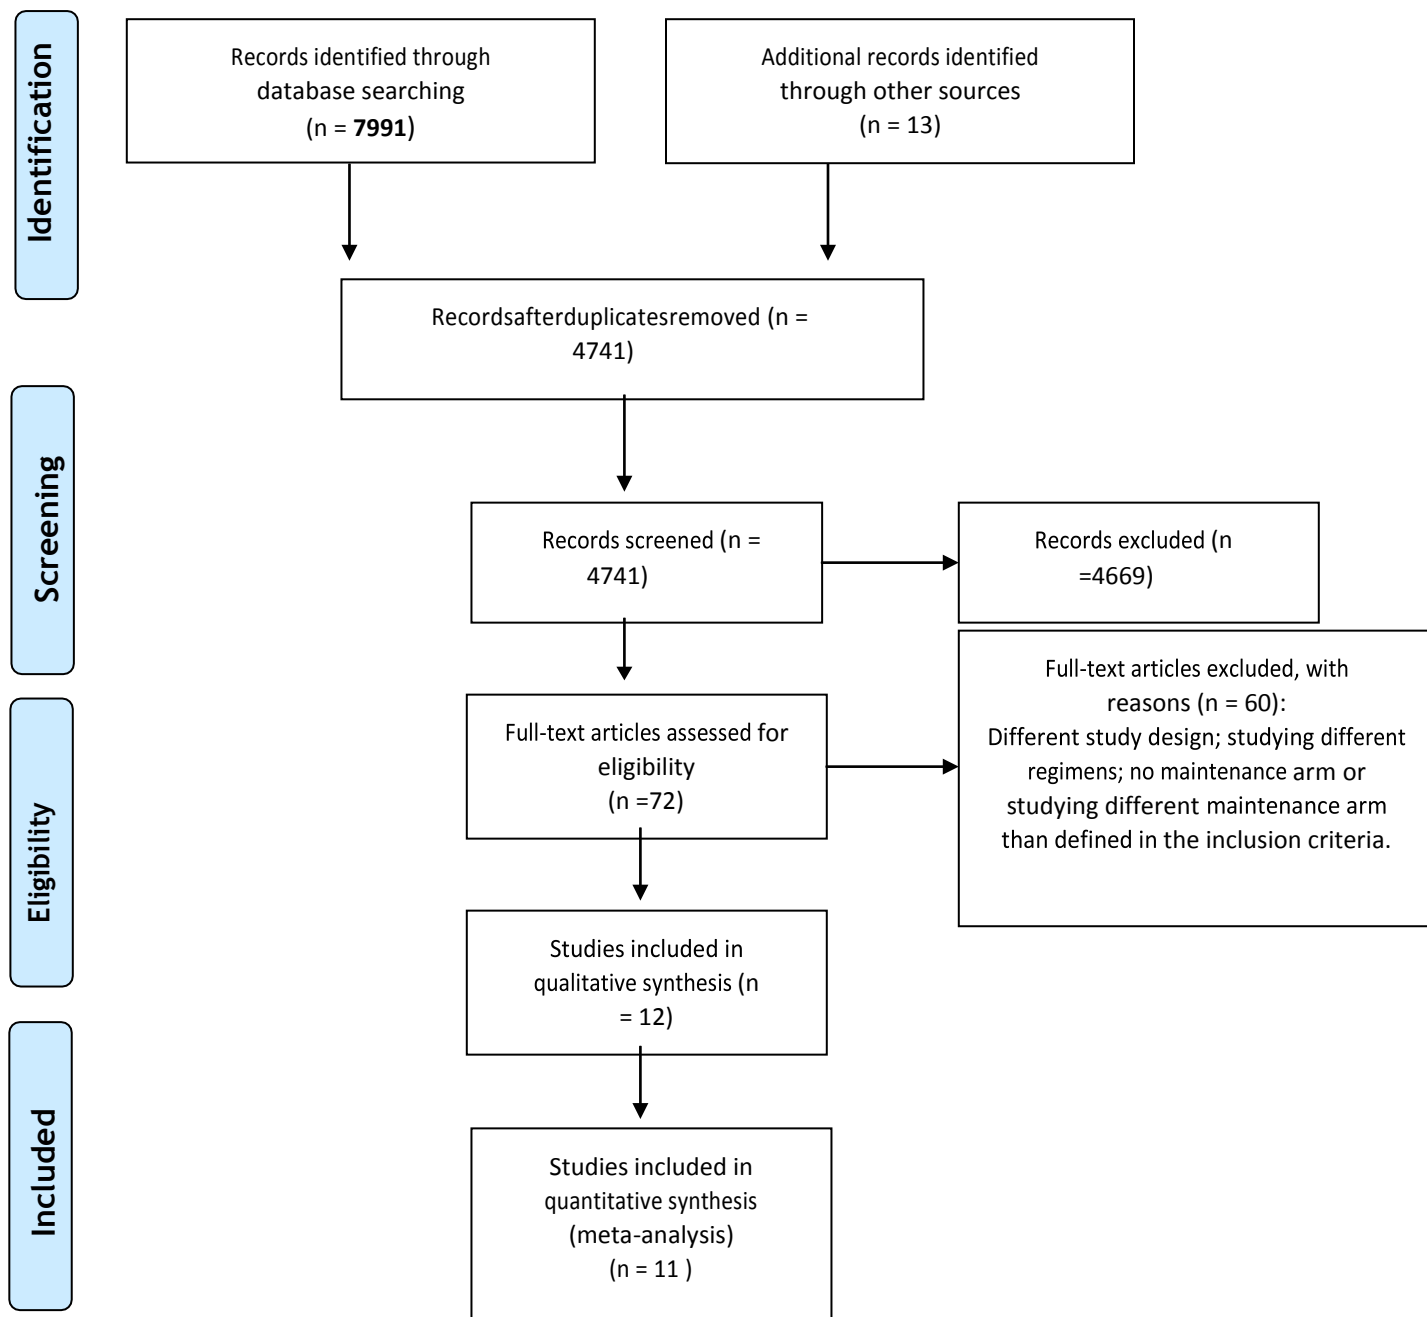

eFigure 2. Evidence Network

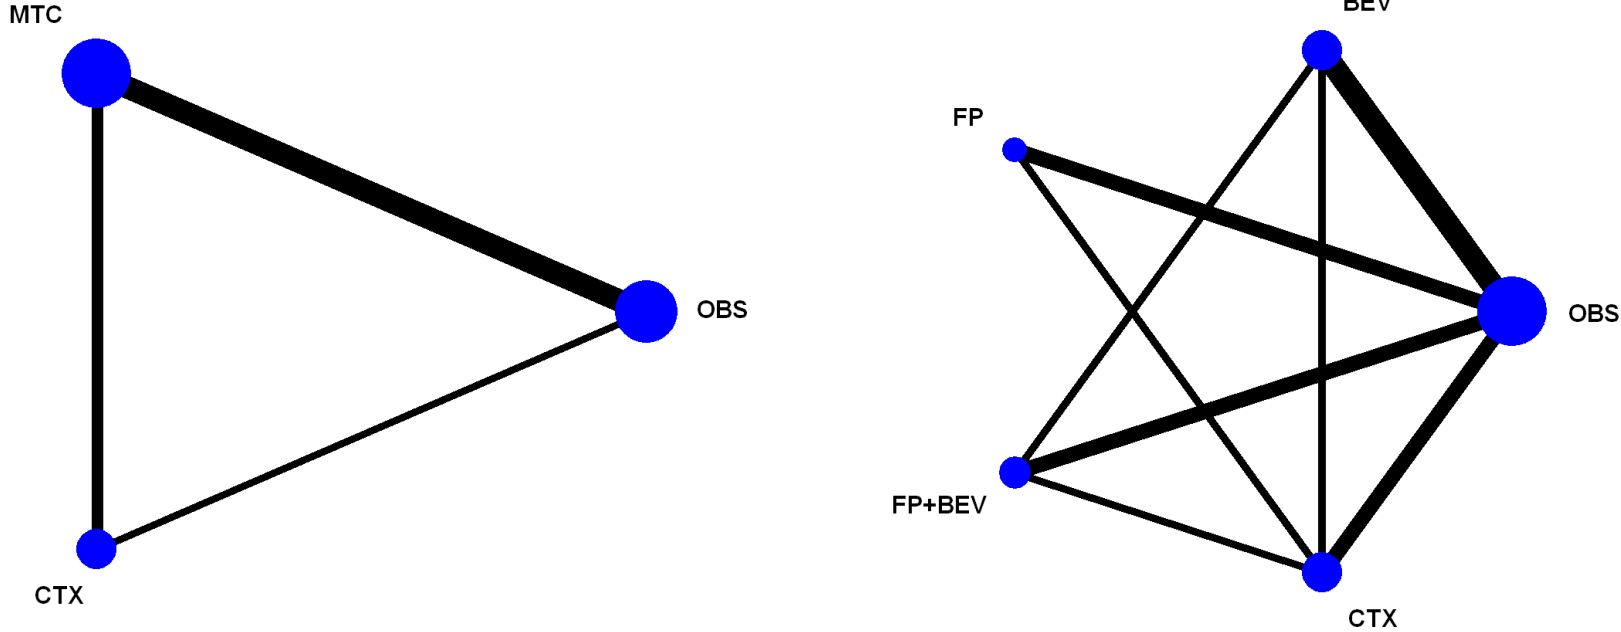

Evidence network of different maintenance strategies used after induction chemotherapy included in the network meta-analysis. Please note that one of the included RCTs was three-arm trials. The thickness of the connecting line corresponds to the number of trials between comparators. MTC: maintenance treatment; OBS: observation; CTX: continuing induction chemotherapy; FP: fluoropyrimidine; BEV: bevacizumab.

**eFigure 3.** Ranking Probabilities of the Different Comparisons for Overall Survival

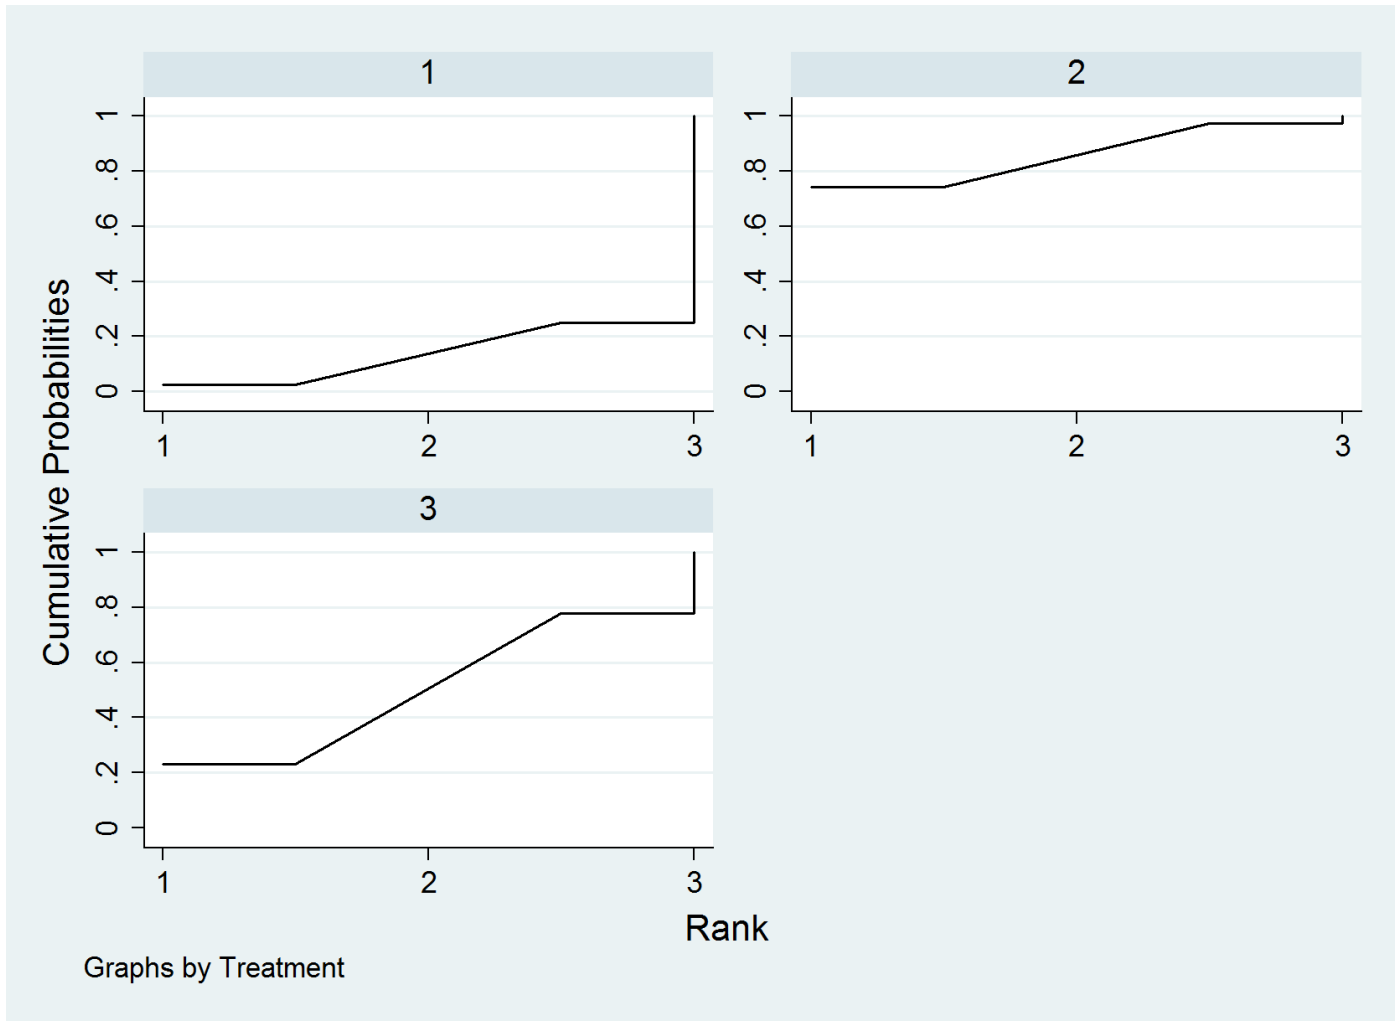

Ranking probabilities of the different comparisons for overall survival. 1: observation; 2: any maintenance treatment with fluoropyrimidine or bevacizumab or the combination of the two ; 3: continuing induction regimen.

**eFigure 4.** Ranking Probabilities of the Different Comparisons for Progression-Free Survival

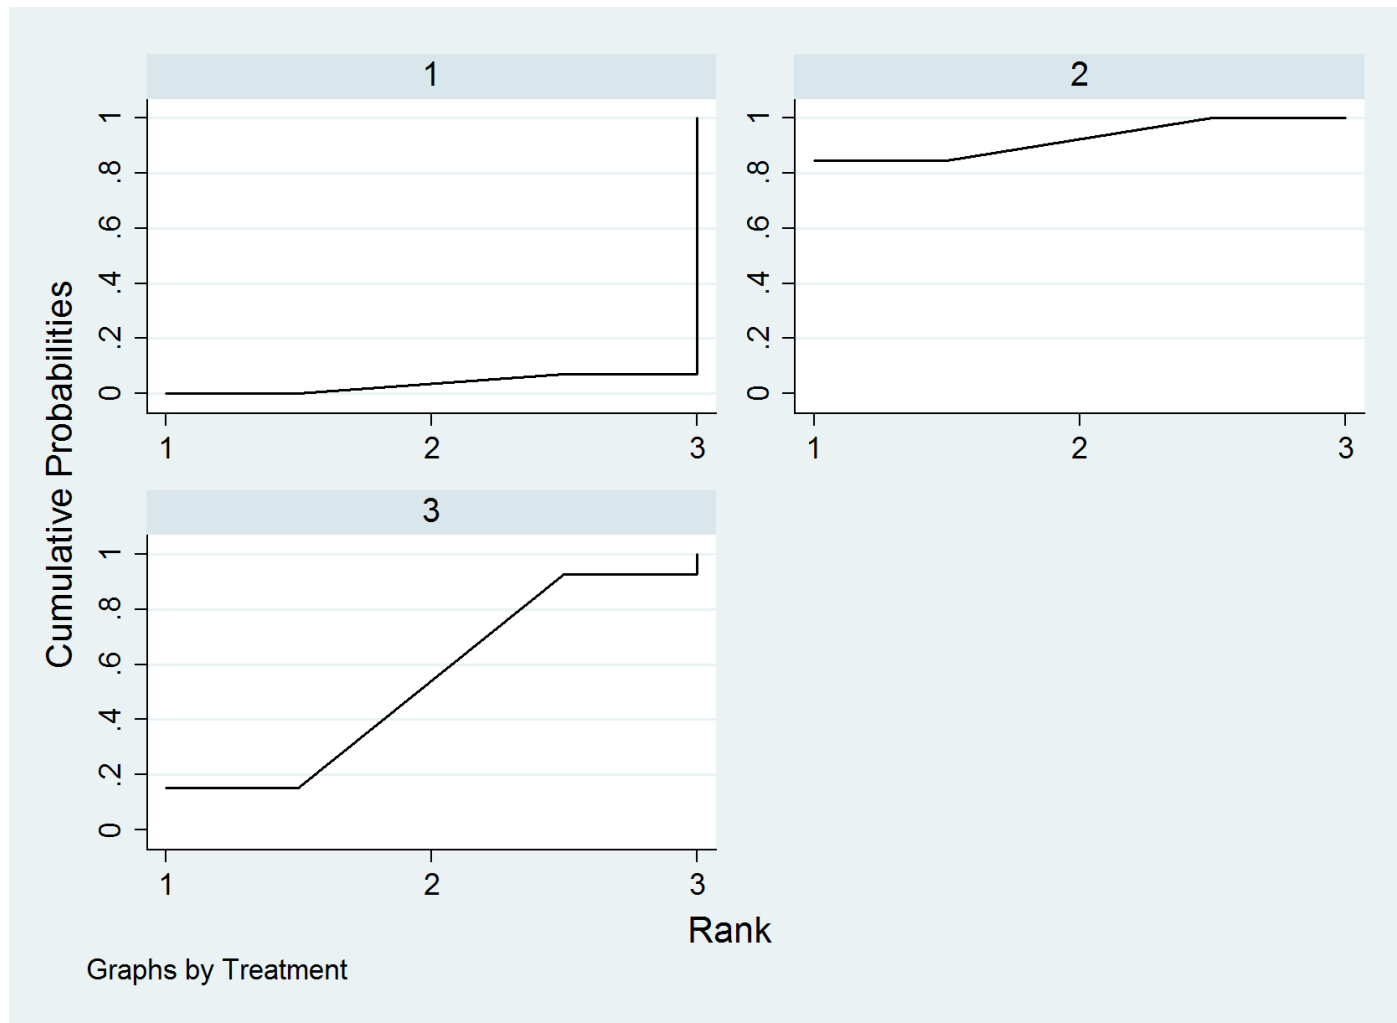

Ranking probabilities of the different comparisons for progression free survival. 1: observation; 2: any maintenance treatment with fluoropyrimidine or bevacizumab or the combination of the two ; 3: continuing induction regimen

**eFigure 5.** Ranking Probabilities of the Different Comparisons for Overall Survival

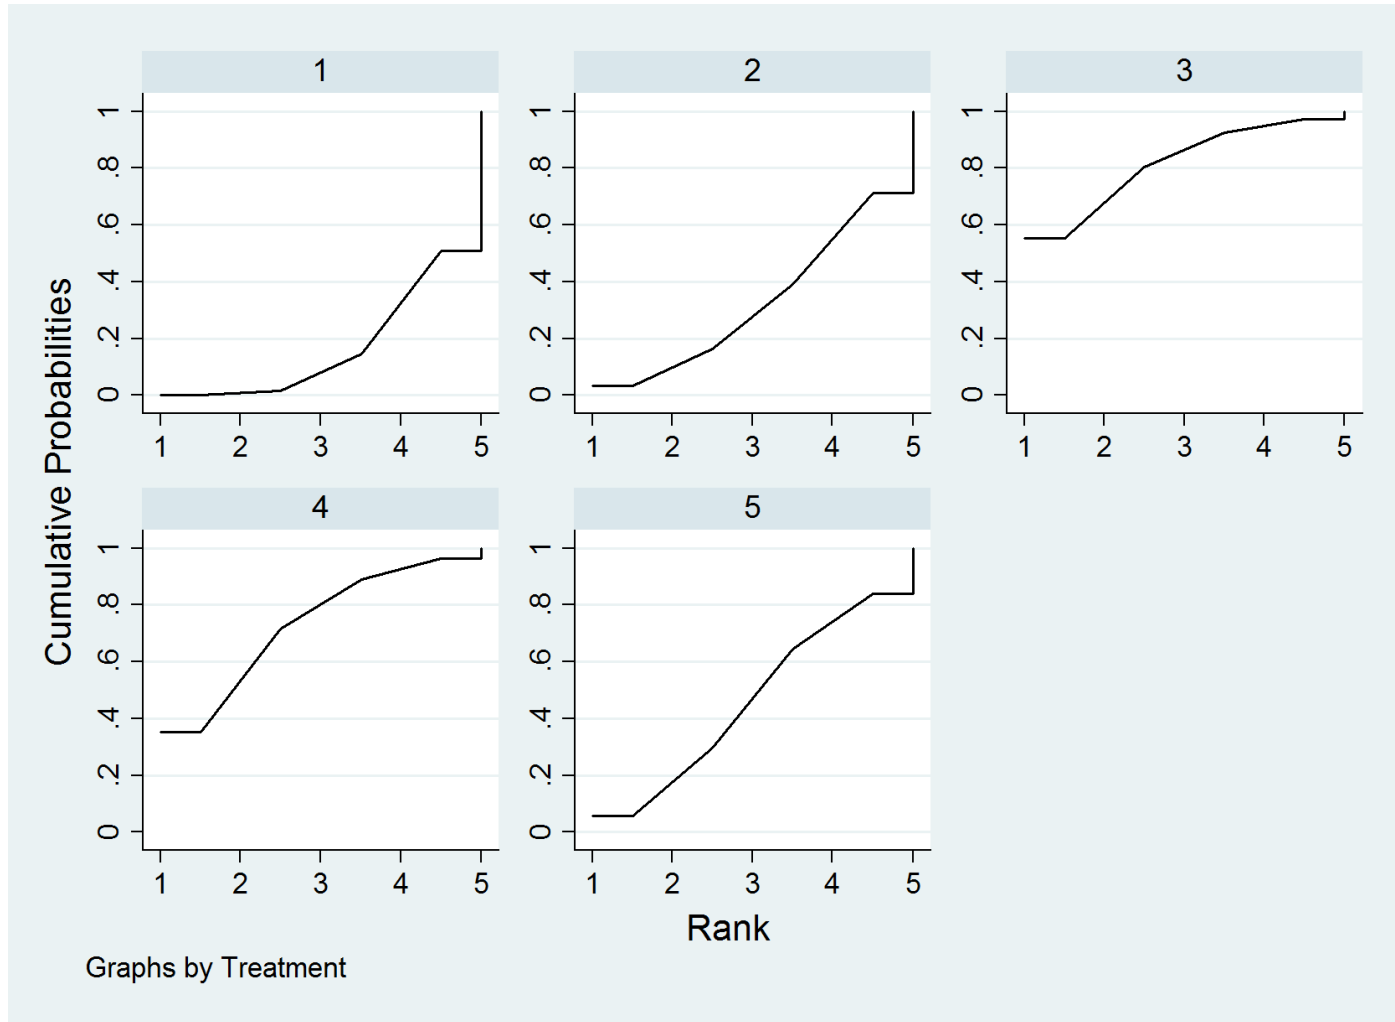

Ranking probabilities of the different comparisons for overall survival. 1: observation; 2: bevacizumab; 3: fluoropyrimidine; 4: fluoropyrimidine+bevacizumab; 5: continuing induction regimen.

**eFigure 6.** Ranking Probabilities of the Different Comparisons for Progression-Free Survival

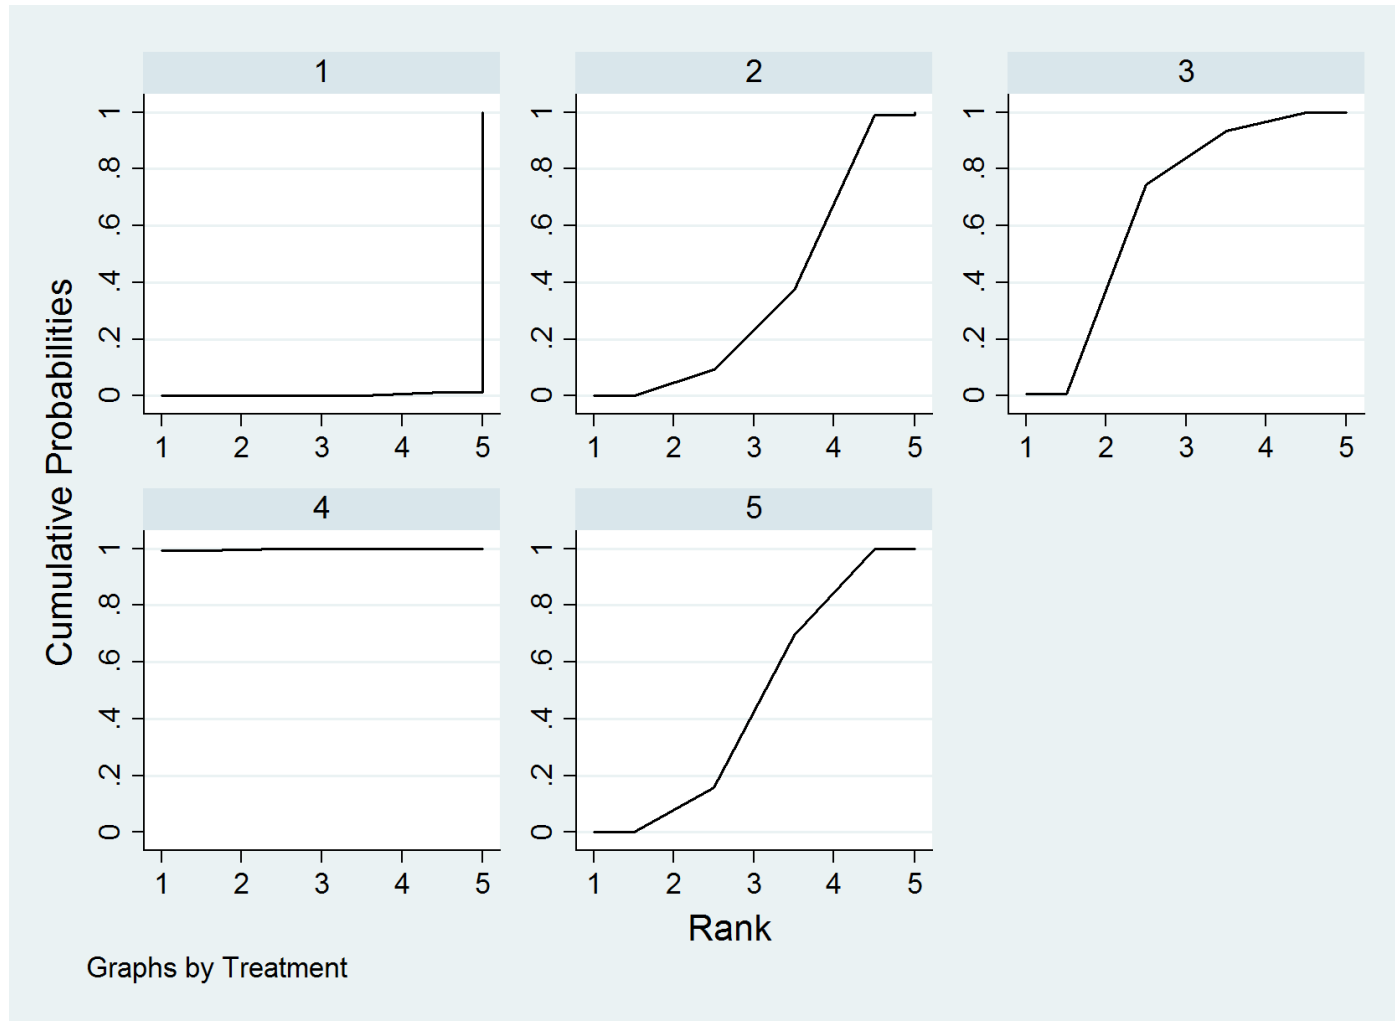

Ranking probabilities of the different comparisons for progression free survival. 1: observation; 2: bevacizumab; 3: fluoropyrimidine; 4: fluoropyrimidine+bevacizumab; 5: continuing induction regimen.

**eFigure 7.** Risk of Bias Graph

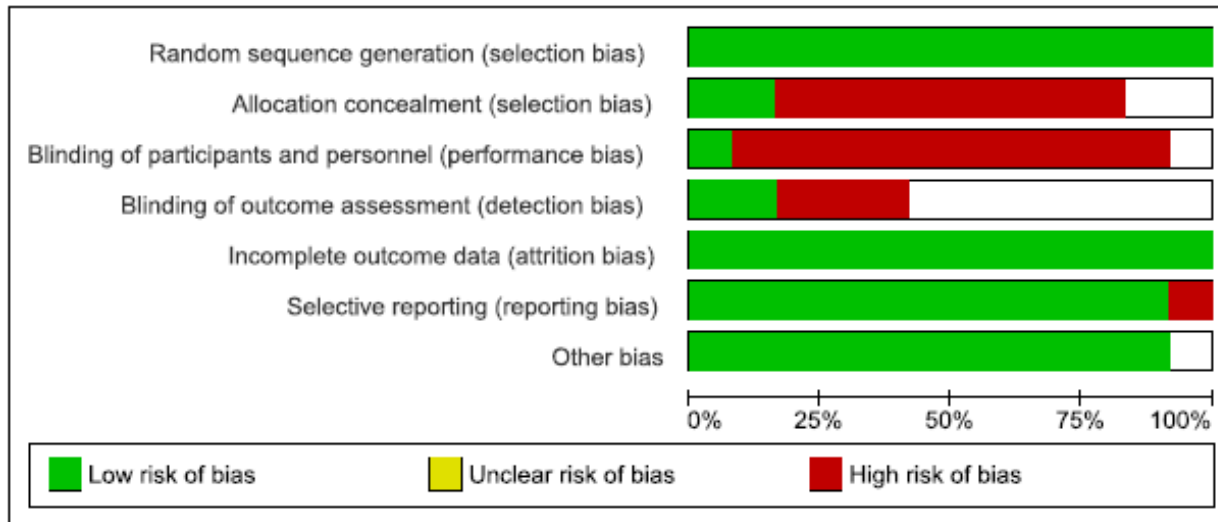

Risk of bias graph: review authors' judgements about each risk of bias item presented as percentages across all included trials.



**eFigure 8.** Risk of Bias Graph

|                | Random sequence generation (selection bias) | Allocation concealment (selection bias) | Blinding of participants and personnel (performance bias) | Blinding of outcome assessment (detection bias) | Incomplete outcome data (attrition bias) | Selective reporting (reporting bias) | Other bias |
|----------------|---------------------------------------------|-----------------------------------------|-----------------------------------------------------------|-------------------------------------------------|------------------------------------------|--------------------------------------|------------|
| AIO 0207       | +                                           | +                                       | -                                                         | -                                               | +                                        | +                                    | +          |
| CAIRO3         | +                                           | -                                       | -                                                         | +                                               | +                                        | +                                    | +          |
| CONcePT        | +                                           | +                                       | +                                                         | +                                               | +                                        | +                                    | +          |
| GISCAD 2011    | +                                           | -                                       | -                                                         |                                                 | +                                        | -                                    |            |
| Luo 2016       | +                                           | -                                       | -                                                         |                                                 | +                                        | +                                    | +          |
| MACRO TTD 2011 | +                                           | -                                       | -                                                         | -                                               | +                                        | +                                    | +          |
| MRC COIN 2011  | +                                           | -                                       | -                                                         | -                                               | +                                        | +                                    | +          |
| OPTIMOX 1      | +                                           |                                         | -                                                         |                                                 | +                                        | +                                    | +          |
| OPTIMOX 2      | +                                           |                                         |                                                           |                                                 | +                                        | +                                    | +          |
| PRODIGE9       | +                                           | -                                       | -                                                         |                                                 | +                                        | +                                    | +          |
| SAKK 41/06     | +                                           | -                                       | -                                                         |                                                 | +                                        | +                                    | +          |
| Yalcin 2013    | +                                           | -                                       | -                                                         |                                                 | +                                        | +                                    | +          |

**eTable 1.** Baseline Characteristics

| Study Title                         | Induction Chemo | Maintenance | NO of Patients | Induction Chemo length | ECOG PS | Median Age (Range) | RAS mutated  | Study Sites               | Randomization before or after induction? | Was re-induction allowed | Location of primary                            | Male % | NO of metastatic sites          |
|-------------------------------------|-----------------|-------------|----------------|------------------------|---------|--------------------|--------------|---------------------------|------------------------------------------|--------------------------|------------------------------------------------|--------|---------------------------------|
| <b>PRODIGE9 (2018)</b> <sup>1</sup> | FOLFIRI+ Bev    | Obs         | 243            | <b>24 weeks</b>        | 0,1,2   | 65                 | mKRAS 46.6 % | France; 66 centers        | Before                                   | Yes 69.5 %               | right (35%); left (64.2 %); rectum (23.9 %)    | 67 %   | 1 site (36.6%); >1 site (63.4%) |
|                                     | FOLFIRI+ Bev    | Bev         | 245            | <b>24 weeks</b>        | 0,1,2   | 64.2               | mKRAS 45.7%  |                           |                                          | Yes 60.2%                | right (41.7 %); left (57.6 %); rectum (17.8 %) | 62 %   | 1 site (42 %);                  |
|                                     |                 |             |                |                        |         |                    |              |                           |                                          |                          |                                                |        |                                 |
| <b>CAIRO3 (2015)</b> <sup>2</sup>   | CapeOx+ Bev     | Obs         | 279            | 18 weeks               | 0,1     | 64                 | mRAS 61%     | Netherlands; 64 hospitals | After                                    | Yes 60%                  | colon (52%); rectum (27%); rectosigmoid (21%)  | 64 %   | 1 site (40 %); >1 site (54 %)   |
|                                     | CapeOx+ Bev     | Cape+ Bev   | 279            | 18 weeks               | 0,1     | 63                 | mRAS 54%     |                           |                                          | yes 47%                  | colon (48%); rectum (30%); rectosigmoid (22%)  | 65 %   | 1 site (42 %); >1 site (54 %)   |

|                                      |                        |                    |                       |                               |                 |                           |                    |                          |                                                 |                                 |                               |               |                               |
|--------------------------------------|------------------------|--------------------|-----------------------|-------------------------------|-----------------|---------------------------|--------------------|--------------------------|-------------------------------------------------|---------------------------------|-------------------------------|---------------|-------------------------------|
| <b>Luo (2016)<sup>3</sup></b>        | CapeOx/FOLFOX          | Obs                | 138                   | 18-24 weeks                   | 0,1             | 54 (23-78)                | NR                 | China; 11 sites          | After                                           | Yes 26.8%                       | colon (60.9%); rectum (39.1%) | 62.3%         | NR                            |
|                                      | CapeOx/FOLFOX          | Cape               | 136                   | 18-24 weeks                   | 0,1             | 56 (27-78)                | NR                 |                          |                                                 | yes 19.1%                       | colon (61.8%); rectum (38.2%) |               | NR                            |
| <b>Sakk 41/06 (2015)<sup>4</sup></b> | Bev +(FPIRI; FPOX; FP) | Obs                | 131                   | 16-24 weeks                   | 0,1             | 65 (23-85)                | NR                 | Switzerland ; 26 centers | After                                           | Not clear                       | NR                            | 73.1%         | 1 site (35%); >1 site (65%)   |
|                                      | Bev +(FPIRI; FPOX; FP) | Bev                | 131                   | 16-24 weeks                   | 0,1             | 63 (40-83)                | NR                 |                          |                                                 | Not clear                       | NR                            | 71%           | 1 site (37%); >1 site (63%)   |
| <b>Study Title</b>                   | <b>Induction Chemo</b> | <b>Maintenance</b> | <b>NO of Patients</b> | <b>Induction Chemo length</b> | <b>EC OG PS</b> | <b>Median Age (Range)</b> | <b>RAS mutated</b> | <b>Study Sites</b>       | <b>Randomization before or after induction?</b> | <b>Was re-induction allowed</b> | <b>Location of primary</b>    | <b>Male %</b> | <b>NO of metastatic sites</b> |
| <b>AIO 0207 (2015)<sup>5</sup></b>   | Bev+FPOX               | Obs                | 158                   | 24 weeks                      | 0,1,2           | 66 (32-82)                | mRAS 53%           | Germany; 106 centers     | After                                           | Yes 46%                         | colon (63%); rectum (37%)     | 63%           | 1 site (38%); >1 site         |

|                                            |                |                     |     |          |           |                |                 |                        |        |         |                                                    |           |                                                        |
|--------------------------------------------|----------------|---------------------|-----|----------|-----------|----------------|-----------------|------------------------|--------|---------|----------------------------------------------------|-----------|--------------------------------------------------------|
|                                            |                |                     |     |          |           |                |                 |                        |        |         |                                                    |           | (61%)                                                  |
|                                            | Bev+FPO<br>X   | Bev                 | 156 | 24 weeks | 0,1,<br>2 | 65 (32-<br>82) | mRA<br>S<br>52% |                        |        | Yes 43% | colon<br>(61%);<br>rectu<br>m<br>(39%)             | 68<br>%   | 1<br>site<br>(44<br>%);<br>>1<br>site<br>(56<br>%)     |
|                                            | Bev+FPO<br>X   | FP+Be<br>v          | 157 | 24 weeks | 0,1,<br>2 | 64 (25-<br>82) | mRA<br>S<br>49% |                        |        | Yes 19% | colon<br>(65%);<br>rectu<br>m<br>(35%)             | 67<br>%   | 1<br>site<br>(45<br>%);<br>>1<br>site<br>(54<br>%)     |
|                                            |                |                     |     |          |           |                |                 |                        |        |         |                                                    |           |                                                        |
| <b>CONce<br/>PT<br/>(2014)<sup>6</sup></b> | FOLFOX<br>+Bev | 5-<br>FU/LV<br>+Bev | 71  | 16 weeks | 0,1       | 61             | NR              | Multicenter            | Before | Yes     | colon<br>(83%);<br>rectu<br>m<br>(11%)             | 50.<br>7% | NR                                                     |
|                                            | FOLFOX<br>+Bev | FOLF<br>OX+Be<br>v  | 68  | 16 weeks | 0,1       | 62             | NR              |                        |        |         | colon<br>(76.4<br>%);<br>rectu<br>m<br>(16%)       | 58.<br>8% | NR                                                     |
|                                            |                |                     |     |          |           |                |                 |                        |        |         |                                                    |           |                                                        |
| <b>Yalcin<br/>(2013)<sup>7</sup></b>       | CapeOx+<br>Bev | Cape+<br>Bev        | 61  | 18 weeks | 0,1,<br>2 | 56 (34-<br>82) | NR              | Turkey;<br>multicenter | Before | NR      | colon<br>(72.4<br>%);<br>rectu<br>m<br>(27.6<br>%) | 62<br>%   | 1<br>site<br>(13.<br>1%);<br>>1<br>site<br>(86.<br>9%) |
|                                            | CapeOx+<br>Bev | CapeO<br>x+Bev      | 62  | 18 weeks | 0,1,<br>2 | 59 (25-<br>77) | NR              |                        |        |         | colon<br>(47.5<br>%);<br>rectu<br>m                | 63<br>%   | 1<br>site<br>(47.<br>5%);<br>>1<br>site                |

|                                     |                        |                    |                       |                               |                |                           |                    |                             |                                                 |                                            | (52.5%)                    |               | (52.5%)                       |
|-------------------------------------|------------------------|--------------------|-----------------------|-------------------------------|----------------|---------------------------|--------------------|-----------------------------|-------------------------------------------------|--------------------------------------------|----------------------------|---------------|-------------------------------|
|                                     |                        |                    |                       |                               |                |                           |                    |                             |                                                 |                                            |                            |               |                               |
| <b>MACRO TTD (2011)<sup>8</sup></b> | CapeOx+Bev             | CapeOx+Bev         | 239                   | 18 weeks                      | 0,1,2          | 63 (30-80)                | NR                 | Spain                       | Before                                          | Not clear                                  | colon (57%); rectum (31%)  | 64%           | NR                            |
|                                     | CapeOx+Bev             | Bev                | 241                   | 18 weeks                      | 0,1,2          | 63 (33-82)                | NR                 |                             |                                                 |                                            | colon (66%); rectum (23%)  | 64%           | NR                            |
| <b>Study Title</b>                  | <b>Induction Chemo</b> | <b>Maintenance</b> | <b>NO of Patients</b> | <b>Induction Chemo length</b> | <b>ECOG PS</b> | <b>Median Age (Range)</b> | <b>RAS mutated</b> | <b>Study Sites</b>          | <b>Randomization before or after induction?</b> | <b>Was re-induction allowed</b>            | <b>Location of primary</b> | <b>Male %</b> | <b>NO of metastatic sites</b> |
|                                     |                        |                    |                       |                               |                |                           |                    |                             |                                                 |                                            |                            |               |                               |
| <b>GISCAD (2011)<sup>9</sup></b>    | FOLFIRI                | FOLFIRI            | 146                   | 8 weeks                       | 0,1,2          | 64.6 (30-76)              | NR                 | Italy; 27 centers           | Before                                          | Yes (implemented even without progression) | colon (68%); rectum (32%)  | 60%           | NR                            |
|                                     | FOLFIRI                | Obs                | 147                   | 8 weeks                       | 0,1,2          | 64.2 (29-76)              | NR                 |                             |                                                 |                                            | colon (79%); rectum (21%)  | 69%           | NR                            |
|                                     |                        |                    |                       |                               |                |                           |                    |                             |                                                 |                                            |                            |               |                               |
| <b>MRC COIN (2011)<sup>10</sup></b> | FOLFOX/CapeOx          | FOLFOX/CapeOx      | 815                   | 12 weeks                      | 0,1,2          | 63 (56-69)                | NR                 | UK and Ireland; 111 centers | Before                                          |                                            | rectum (31%)               | 64%           | 1 site (35%); >1 site (64%)   |
|                                     | FOLFOX/CapeOx          | Obs                | 815                   | 12 weeks                      | 0,1,2          | 63 (58-70)                | NR                 |                             |                                                 | Yes 64%                                    | rectum (30%)               | 64%           | 1 site (35%); >1 site (>1%)   |

|                                      |          |         |     |          |       |            |    |                           |        |                                                |                               |       | site (65%)                      |
|--------------------------------------|----------|---------|-----|----------|-------|------------|----|---------------------------|--------|------------------------------------------------|-------------------------------|-------|---------------------------------|
| <b>OPTIMO X2 (2009)<sup>11</sup></b> | mFOLFOX7 | Obs     | 104 | 12 weeks | 0,1,2 | 67 (31-80) | NR | 12 centers                | Before | yes63%                                         | colon (70.2%); rectum (25%)   | 58.6% | 1 site (51.9%); >1 site (48.1%) |
|                                      | mFOLFOX7 | 5-FU/LV | 98  | 12 weeks | 0,1,2 | 67 (35-80) | NR |                           |        | yes 55%                                        | colon (61.2%); rectum (37.8%) | 60.2% | 1 site (41.8%); >1 site (58.2%) |
| <b>OPTIMO X1 (2006)<sup>12</sup></b> | FOLFOX4  | FOLFOX4 | 311 | 12 weeks | 0,1,2 | 65 (29-80) | NR | 56 centers in 5 countries | Before |                                                | colon (65%); rectum (32%)     | 59%   | 1 site (59%); >1 site (40%)     |
|                                      | FOLFOX7  | 5-FU/LV | 309 | 12 weeks | 0,1,2 | 64 (32-80) | NR |                           |        | Yes 40% (implemented even without progression) | colon (62%); rectum (36%)     | 61%   | 1 site (59%); >1 site (41%)     |

eTable 1. Baseline characteristics of the included studies. . OBS: observation; CTX: continuing induction chemotherapy; FP: fluoropyrimidine; BEV: bevacizumab.

**eTable 2.** Ranking Probabilities of Different Maintenance Strategies

| Strategy                                     | SUCRA % for OS | SUCRA % for PFS |
|----------------------------------------------|----------------|-----------------|
| <b>OBS vs. MTC vs. CTX</b>                   |                |                 |
| <b>OBS</b>                                   | 13.9           | 3.6             |
| <b>MTC</b>                                   | 85.7           | 92.2            |
| <b>CTX</b>                                   | 50.4           | 54.1            |
| <b>OBS vs. BEV vs. FP vs. FP+Bev vs. CTX</b> |                |                 |
| <b>OBS</b>                                   | 0.3            | 0.3             |
| <b>Bev</b>                                   | 32.6           | 36.5            |
| <b>FP</b>                                    | 81.3           | 67.1            |
| <b>FP + Bev</b>                              | 73.2           | 99.8            |
| <b>CTX</b>                                   | 46             | 46.3            |

Table illustrating ranking probabilities of different maintenance strategies. SUCRA: surface under the cumulative ranking; OS: overall survival; PFS: progression free survival; Obs: observation; MTC: maintenance; CTX: continuing induction regimen; Bev: bevacizumab; FP: fluoropyrimidine.

**eTable 3.** Quality of Evidence Table (GRADE)

| Certainty assessment                 |                   |               |               |              |             |                      | Effect                           | Certainty        | Importance |
|--------------------------------------|-------------------|---------------|---------------|--------------|-------------|----------------------|----------------------------------|------------------|------------|
| No of studies                        | Study design      | Risk of bias  | Inconsistency | Indirectness | Imprecision | Other considerations | HR*<br>(95% CI)                  |                  |            |
| <b>MTC vs OBS - Overall survival</b> |                   |               |               |              |             |                      |                                  |                  |            |
| Network meta-analysis (6 trials)     | Randomized trials | not serious † | not serious   | not serious  | Serious*    | none                 | <b>HR 0.91</b><br>(0.83 - 1.009) | ⊕⊕⊕○<br>Moderate | Critical   |
| <b>CTX vs OBS - Overall survival</b> |                   |               |               |              |             |                      |                                  |                  |            |
| Network meta-analysis (2 trials)     | Randomized trials | not serious † | not serious   | not serious  | Serious*    | none                 | <b>HR 0.95</b><br>(0.85 - 1.07)  | ⊕⊕⊕○<br>Moderate | Critical   |
| <b>CTX vs OBS - Overall survival</b> |                   |               |               |              |             |                      |                                  |                  |            |
| Network meta-analysis (3 trials)     | Randomized trials | not serious † | not serious   | not serious  | Serious*    | none                 | <b>HR 1.04</b><br>(0.92 - 1.17)  | ⊕⊕⊕○<br>Moderate | Critical   |

CI: Confidence interval; HR: Hazard ratio

\* Insufficient data to estimate absolute effects

\*\*Confidence intervals include appreciable benefits and harms

† Although risk of bias is moderate for the included studies due to lack of blinding of outcome assessments, but the outcome of overall survival is independent of blinded assessment.



**eTable 4.** Adverse Events

| Study ID                                                                        | Arm    | N<br>O | HTN       | Thrombosis | Any Hematologic AEs | HFSR     | Any GI AEs | Mucositis | Increased ALT/AST | Increased Bili | Neuropathy | All grade 3 or higher | Number that discontinued due to AE |
|---------------------------------------------------------------------------------|--------|--------|-----------|------------|---------------------|----------|------------|-----------|-------------------|----------------|------------|-----------------------|------------------------------------|
| <b>PRODIGE9 (Aparicio 2018)</b> <sup>1</sup>                                    | Obs    | 243    | 2 (0.8%)  | 1 (0.4%)   | 2 (0.8%)            | NR       | 9 (3.7%)   | NR        | 1 (0.4%)          | 2 (0.8)        | NR         | 34 (14%)              | NR                                 |
|                                                                                 | Bev    | 245    | 15 (6.1%) | 5 (2%)     | 2 (0.8%)            | NR       | 10 (4.1%)  | NR        | 6 (2.4%)          | 8 (3.3%)       | NR         | 81 (33.1%)            | NR                                 |
|                                                                                 |        |        |           |            |                     |          |            |           |                   |                |            |                       |                                    |
| <b>CAIRO3*(Goey2017; Simkens 2015)</b> <sup>2,13</sup>                          | Obs    | 279    | 49 (18%)  | NR         | NR                  | 0%       | NR         | NR        | NR                | 1 (<1%)        | 14 (5%)    | 95 (34%)              | NR                                 |
|                                                                                 | FP+Bev | 278    | 68 (24%)  | NR         | NR                  | 64 (23%) | NR         | NR        | NR                | 14 (5%)        | 27 (10%)   | 167 (60%)             | 27 (10%)                           |
|                                                                                 |        |        |           |            |                     |          |            |           |                   |                |            |                       |                                    |
| <b>Luo 2016</b> <sup>3</sup>                                                    | Obs    | 138    | NR        | NR         | 18 (13%)            | 1 (0.7%) | 7 (5%)     | 4 (2.9%)  | NR                | NR             | NR         | 31 (22.4%)            | NR                                 |
|                                                                                 | FP     | 136    | NR        | NR         | 28 (22.5%)          | 8 (5.9%) | 10 (7.3%)  | 8 (5.9%)  | NR                | NR             | NR         | 57 (41.9%)            | NR                                 |
|                                                                                 |        |        |           |            |                     |          |            |           |                   |                |            |                       |                                    |
| <b>Sakk 41/06</b> <sup>4</sup>                                                  | Obs    | 131    | 1 (<1%)   | 0          | NR                  | NR       | NR         | NR        | NR                | NR             | NR         | 1 (1%)                | NR                                 |
|                                                                                 | Bev    | 131    | 6 (4.5%)  | 2 (1.5%)   | NR                  | NR       | NR         | NR        | NR                | NR             | NR         | 8 (6%)                | 0                                  |
|                                                                                 |        |        |           |            |                     |          |            |           |                   |                |            |                       |                                    |
| <b>AIO 0207 (Hegewisch-Becker 2015; Noepel-Duenebacke 2018)</b> <sup>5,14</sup> | obs    | 158    | 2 (1%)    | 2 (1%)     | 1 (<1%)             | 1 (<1%)  | 0          | 1 (<1%)   | 0                 | NR             | NR         | NR                    | NR                                 |

| Study ID                       | Arm    | NO  | HTN      | Thrombosis | Any Hematologic AEs | HFSR     | Any GI AEs                | Mucositis | Increase d ALT/AST | Increase d Bili | Neuropathy | All grade 3 or higher | Number that discontinued due to AE |
|--------------------------------|--------|-----|----------|------------|---------------------|----------|---------------------------|-----------|--------------------|-----------------|------------|-----------------------|------------------------------------|
|                                | bev    | 156 | 3 (2%)   | 1 (<1%)    | 4 (3%)              | 1 (1%)   | 1 (<1%)                   | 1 (<1%)   | 1 (<1%)            | NR              | NR         | NR                    | NR                                 |
|                                |        |     |          |            |                     |          |                           |           |                    |                 |            |                       |                                    |
|                                | obs    | 158 | 2 (1%)   | 2 (1%)     | 1 (<1%)             | 1 (<1%)  | 1 (<1%)                   | 1 (<1%)   | 0                  | NR              | NR         | NR                    | NR                                 |
|                                | FP+bev | 158 | 5 (3%)   | 3 (2%)     | 3 (2%)              | 4 (3%)   | 5 (3%) (+1 perforation)   | 1 (<1%)   | 0                  | NR              | NR         | NR                    | NR                                 |
|                                |        |     |          |            |                     |          |                           |           |                    |                 |            |                       |                                    |
|                                | bev    | 156 | 3 (2%)   | 2 (1%)     | 4 (3%)              | 1 (<1%)  | 0                         | 1 (<1%)   | 1 (<1%)            | NR              | NR         | NR                    | NR                                 |
|                                | FP+bev | 158 | 5 (3%)   | 3 (2%)     | 3 (2%)              | 4 (3%)   | 5 (3%) (+1 perforation)   | 1 (<1%)   | 0                  | NR              | NR         | NR                    | NR                                 |
|                                |        |     |          |            |                     |          |                           |           |                    |                 |            |                       |                                    |
| <b>CONcept<sup>6</sup></b>     | FP+bev | 36  | 1 (2.8%) | NR         | 6 (16.7%)           | 0        | 9 (9.8%)                  | NR        | NR                 | NR              | 4 (11.1%)  | 6 (16.7%)             | NR                                 |
|                                | Cont   | 33  | 1 (3%)   | NR         | 9 (27.3%)           | 0        | 4 (12.1%)                 | NR        | NR                 | NR              | 10 (30.3%) | 8 (24%)               | NR                                 |
|                                |        |     |          |            |                     |          |                           |           |                    |                 |            |                       |                                    |
| <b>Yalcin 2013<sup>7</sup></b> | FP+bev | 61  | 3.30%    | NR         | 3.30%               | 1.60%    | 9.80%                     | NR        | NR                 | NR              | 1.60%      | 34.40%                | 6                                  |
|                                | Cont   | 62  | 1.60%    | NR         | 11.30%              | 1.60%    | 22.60%                    | NR        | NR                 | NR              | 8.10%      | 48.40%                | 9                                  |
|                                |        |     |          |            |                     |          |                           |           |                    |                 |            |                       |                                    |
| <b>MACRO TTD<sup>8</sup></b>   | Cont   | 238 | 9 (4%)   | 2 (<1%)    | NR                  | 30 (13%) | 26 (11%) * 2 perforations | NR        | NR                 | NR              | 61 (26%)   | 132 (55%)             | 132 (55%)                          |
|                                | bev    | 238 | 17 (7%)  | 3 (1%)     | NR                  | 16 (7%)  | 31 (13%) *1 perforation   | NR        | NR                 | NR              | 18 (8%)    | 114 (47%)             | 114 (47%)                          |
|                                |        |     |          |            |                     |          |                           |           |                    |                 |            |                       |                                    |
|                                |        |     |          |            |                     |          |                           |           |                    |                 |            |                       |                                    |
| <b>GISCAD<sup>9</sup></b>      | cont   | 146 | NR       | NR         | 11 (7.5%)           | NR       | 32 (21.9%)                | 0         | 21 (14.4%)         | NR              | NR         | NR                    | 6 (4.1%)                           |

|                                |      |     |    |    |           |            |                |       |               |    |           |            |    |
|--------------------------------|------|-----|----|----|-----------|------------|----------------|-------|---------------|----|-----------|------------|----|
|                                | obs  | 147 | NR | NR | 8 (5.4%)  | NR         | 29 (19.7%)     | 0     | 15<br>(10.2%) | NR | NR        | NR         | NR |
| <b>MRC COIN</b> <sup>10</sup>  | cont | 815 | NR | NR | 75 (9.2%) | 21<br>(5%) | 55 (6.7%)      | NR    | NR            | NR | 126 (27%) | NR         | NR |
|                                | Obs  | 815 | NR | NR | 62 (7.6%) | 15<br>(3%) | 105<br>(12.9%) | NR    | NR            | NR | 25 (5%)   | NR         | NR |
| <b>OPTIMOX2</b> <sup>11</sup>  | Obs  | 104 | NR | NR | NR        |            | 0              | NR    | NR            | NR | NR        | NR         | NR |
|                                | FP   | 98  | NR | NR | 11.40%    | 4.90<br>%  | NR             | 0.30% | NR            | NR | 4.90%     | NR         | NR |
| <b>OPTIMOX 1</b> <sup>12</sup> | cont | 311 | NR | NR | 38.00%    | NR         | 16%            | 3.00% | NR            | NR | 18%       | 54.40<br>% | NR |
|                                | FP   | 309 | NR | NR | 31%       | NR         | 20%            | 6%    | NR            | NR | 13%       | 48.20<br>% | NR |

NO: number of patients; HTN: hypertension; AEs: adverse events; HFSR: hand-foot skin reaction; GI: gastrointestinal; NR: not reported. \* reported only AEs that occurred in >5% frequency.

## eMethods. Search Strategy

**4.25.19 PubMed Search Strategy (2133):** Search: (((((((((((("Antineoplastic Agents"[Mesh] OR "Antineoplastic Combined Chemotherapy Protocols"[Mesh])) OR bevacizumab) OR 5-fu) OR capecitabine) OR fluoropyrimidine) OR avastin) OR panitumumab) OR cetuximab) OR (oxaliplatin OR folfox))) AND (((("colorectal cancer") OR "Colorectal Neoplasms"[Mesh])) AND (("Neoplasm Metastasis"[Mesh]) OR (advanced OR metastat\* OR metastas\*)))) AND (((("Drug Administration Schedule"[Mesh]) OR (continuous AND intermittent)) OR (maintenance[tiab] OR "stop and go" OR continuous[tiab] OR continuation[tiab] OR intermittent[tiab])) Filters: to 2019/04/01, English

### 4.25.19 Database: Embase <1988 to 2019 Week 16> Search Strategy (2804)

---

- 1 exp colorectal cancer/ or exp colorectal carcinoma/ (159163)
- 2 exp antineoplastic agent/ (1856057)
- 3 bevacizumab.mp. (53811)
- 4 5-fu.mp. or fluorouracil/ (117969)
- 5 capecitabine plus oxaliplatin/ or capecitabine.mp. (27797)
- 6 fluoropyrimidine.mp. (6890)
- 7 avastin.mp. (9746)
- 8 panitumumab.mp. (7766)
- 9 cetuximab.mp. (26570)
- 10 oxaliplatin.mp. (36647)
- 11 folfox.mp. (4315)
- 12 exp combination chemotherapy/ (111963)
- 13 exp cancer combination chemotherapy/ (77024)
- 14 advanced.ti. or advanced.ab. (531272)
- 15 exp advanced cancer/ (86727)
- 16 metastatic.mp. (303605)
- 17 metastasis.mp. or metastasis/ (594668)
- 18 metastases.mp. (198745)
- 19 14 or 15 or 16 or 17 or 18 (1170703)
- 20 1 and 19 (61636)
- 21 2 or 3 or 4 or 5 or 6 or 7 or 8 or 9 or 10 or 11 or 12 or 13 (1879733)
- 22 (continuous or intermittent or maintenance or continuation).ab. or (continuous or intermittent or maintenance or continuation).ti. (810007)
- 23 stop-and-go.mp. (514)
- 24 drug administration schedule.mp. (186)
- 25 exp drug intermittent therapy/ (4181)
- 26 exp continuous infusion/ (40617)
- 27 exp maintenance therapy/ (50009)
- 28 22 or 23 or 24 or 25 or 26 or 27 (852830)
- 29 20 and 21 and 28 (2963)
- 30 limit 29 to english language (2821)
- 31 201904\*.em. (65374)
- 32 30 not 31 (2804)

**5.1.19 Scopus (1821)** ( ( ( TITLE-ABS-KEY ( "colorectal cancer" ) AND TITLE-ABS-KEY ( advanced OR metastatic OR metastasis OR metastases ) ) ) AND ( ( TITLE-ABS-KEY ( "antineoplastic combined chemotherapy" ) OR TITLE-ABS-KEY ( bevacizumab OR f-fu OR capecitabine OR fluoropyrimidine OR avastin OR panitumumab OR cetuximab OR oxaliplatin OR folfox ) OR TITLE-ABS-KEY ( "combination chemotherapy" OR "cancer combinatin chemotherapy" ) ) ) AND ( TITLE-ABS-KEY ( continuous OR intermittent OR maintenance OR stop-and-go ) ) ) AND NOT ( PUBDATETXT ( april 2019 ) OR PUBDATETXT ( may 2019 ) ) AND ( LIMIT-TO ( LANGUAGE , "English" ) )

**5.1.19 Web of Science (1190)**

TOPIC: (" advanced colorectal cancer" OR "metastatic colorectal cancer") AND

TOPIC: ("antineoplastic combined chemotherapy") OR TOPIC: (bevacizumab OR avastin OR 5-fu OR capecitabine OR fluoropyrimidine OR panitumumab OR cetuximab OR oxaliplatin OR folfox) AND TOPIC: (continuous OR maintenance OR intermittent OR continuation) Refined by: LANGUAGES: ( ENGLISH ) Indexes=SCI-EXPANDED, ESCI

Timespan=All years

**5.1.19 Cochrane Database of Systematic Reviews <2005 to April 26, 2019> Search Strategy: (43)**

- 1 colorectal cancer.mp. [mp=title, short title, abstract, full text, keywords, caption text] (275)
- 2 colorectal carcinoma.mp. [mp=title, short title, abstract, full text, keywords, caption text] (32)
- 3 advanced.mp. [mp=title, short title, abstract, full text, keywords, caption text] (1821)
- 4 metastatic.mp. [mp=title, short title, abstract, full text, keywords, caption text] (431)
- 5 metastasis.mp. [mp=title, short title, abstract, full text, keywords, caption text] (303)
- 6 metastases.mp. [mp=title, short title, abstract, full text, keywords, caption text] (362)
- 7 3 or 4 or 5 or 6 (2054)
- 8 1 or 2 (279)
- 9 7 and 8 (153)
- 10 combination chemotherapy.mp. [mp=title, short title, abstract, full text, keywords, caption text] (88)
- 11 combined chemotherapy.mp. [mp=title, short title, abstract, full text, keywords, caption text] (119)
- 12 antineoplastic combined chemotherapy.mp. [mp=title, short title, abstract, full text, keywords, caption text] (107)
- 13 antineoplastic agents.mp. [mp=title, short title, abstract, full text, keywords, caption text] (217)
- 14 (bevacizumab or 5-fu or capecitabine or fluoropyrimidine or avastin or panitumumab or cetuximab or oxaliplatin or folfox).mp. [mp=title, short title, abstract, full text, keywords, caption text] (177)
- 15 10 or 11 or 12 or 13 or 14 (389)
- 16 9 and 15 (57)
- 17 (continuous or continuation or maintenance or intermittent).mp. [mp=title, short title, abstract, full text, keywords, caption text] (8118)
- 18 16 and 17 (43)

**9.7.18 Author supplied (13)**

| DATABASE                                | RESULTS     | DUPLICATES  | REMAINING   |
|-----------------------------------------|-------------|-------------|-------------|
| PubMed                                  | 2133        | 28          | 2105        |
| Embase                                  | 2804        | 879         | 1925        |
| Scopus                                  | 1821        | 1661        | 160         |
| Web of Science                          | 1190        | 693         | 497         |
| Cochrane Database of Systematic Reviews | 43          | 2           | 41          |
| <b>TOTAL</b>                            | <b>7991</b> | <b>3263</b> | <b>4728</b> |

## eReferences

1. Aparicio T, Ghiringhelli F, Boige V, et al. Bevacizumab Maintenance Versus No Maintenance During Chemotherapy-Free Intervals in Metastatic Colorectal Cancer: A Randomized Phase III Trial (PRODIGE 9). *J Clin Oncol*. 2018;36(7):674-681.
2. Simkens LH, van Tinteren H, May A, et al. Maintenance treatment with capecitabine and bevacizumab in metastatic colorectal cancer (CAIRO3): a phase 3 randomised controlled trial of the Dutch Colorectal Cancer Group. *Lancet (London, England)*. 2015;385(9980):1843-1852.
3. Luo HY, Li YH, Wang W, et al. Single-agent capecitabine as maintenance therapy after induction of XELOX (or FOLFOX) in first-line treatment of metastatic colorectal cancer: randomized clinical trial of efficacy and safety. *Ann Oncol*. 2016;27(6):1074-1081.
4. Koeberle D, Betticher DC, von Moos R, et al. Bevacizumab continuation versus no continuation after first-line chemotherapy plus bevacizumab in patients with metastatic colorectal cancer: a randomized phase III non-inferiority trial (SAKK 41/06). *Ann Oncol*. 2015;26(4):709-714.
5. Hegewisch-Becker S, Graeven U, Lerchenmuller CA, et al. Maintenance strategies after first-line oxaliplatin plus fluoropyrimidine plus bevacizumab for patients with metastatic colorectal cancer (AIO 0207): a randomised, non-inferiority, open-label, phase 3 trial. *Lancet Oncol*. 2015;16(13):1355-1369.
6. Hochster HS, Grothey A, Hart L, et al. Improved time to treatment failure with an intermittent oxaliplatin strategy: results of CONcept. *Ann Oncol*. 2014;25(6):1172-1178.
7. Yalcin S, Uslu R, Dane F, et al. Bevacizumab + capecitabine as maintenance therapy after initial bevacizumab + XELOX treatment in previously untreated patients with metastatic colorectal cancer: phase III 'Stop and Go' study results--a Turkish Oncology Group Trial. *Oncology*. 2013;85(6):328-335.
8. Díaz-Rubio E, Gómez-España A, Massutí B, et al. First-Line XELOX plus bevacizumab followed by XELOX plus bevacizumab or single-agent bevacizumab as maintenance therapy in patients with metastatic colorectal cancer: The phase III MACRO TTD study. *Onkologie*. 2012;6(2):96-103.
9. Labianca R, Sobrero A, Isa L, et al. Intermittent versus continuous chemotherapy in advanced colorectal cancer: a randomised 'GISCAD' trial. *Ann Oncol*. 2011;22(5):1236-1242.
10. Adams RA, Meade AM, Seymour MT, et al. Intermittent versus continuous oxaliplatin and fluoropyrimidine combination chemotherapy for first-line treatment of advanced colorectal cancer: results of the randomised phase 3 MRC COIN trial. *Lancet Oncol*. 2011;12(7):642-653.
11. Chibaudel B, Maindrault-Goebel F, Lledo G, et al. Can chemotherapy be discontinued in unresectable metastatic colorectal cancer? The GERCOR OPTIMOX2 Study. *J Clin Oncol*. 2009;27(34):5727-5733.
12. Tournigand C, Cervantes A, Figer A, et al. OPTIMOX1: a randomized study of FOLFOX4 or FOLFOX7 with oxaliplatin in a stop-and-Go fashion in advanced colorectal cancer--a GERCOR study. *J Clin Oncol*. 2006;24(3):394-400.
13. Goey KKH, Elias SG, van Tinteren H, et al. Maintenance treatment with capecitabine and bevacizumab versus observation in metastatic colorectal cancer: Updated results and molecular subgroup analyses of the phase 3 CAIRO3 study. *Annals of Oncology*. 2017;28(9):2128-2134.
14. Noepel-Duenebacke S, Arnold D, Hertel J, et al. Impact of the Localization of the Primary Tumor and RAS/BRAF Mutational Status on Maintenance Strategies After First-line Oxaliplatin, Fluoropyrimidine, and Bevacizumab in Metastatic Colorectal Cancer: Results From the AIO 0207 Trial. *Clinical colorectal cancer*. 2018.
